# Supplementary material for: Alpha-Carbonic Anhydrases from Hydrothermal Vent Sources as Potential Carbon Dioxide Sequestration Agents: In Silico Sequence, Structure and Dynamics Analyses
Source: PubMed Central journal article supplement (PMC7662607; doi:10.3390/ijms21218066), 2020-10-29
Supplement: ijms-21-08066-s001.pdf [file ijms-21-08066-s001.pdf]

**Supplementary data: Alpha-carbonic anhydrases from hydrothermal vent sources as potential carbon dioxide sequestration agents: *In silico* sequence, structure and dynamics analyses of  $\alpha$ -carbonic anhydrases**

**Colleen Varaidzo Manyumwa<sup>1</sup>, Reza Zolfaghari Emameh<sup>2</sup> and Özlem Tastan Bishop<sup>1\*</sup>**

<sup>1</sup> Research Unit in Bioinformatics (RUBi), Department of Biochemistry and Microbiology, Rhodes University, Grahamstown, 6140, South Africa; colleen.manyumwa06@gmail.com; O.TastanBishop@ru.ac.za

<sup>2</sup> Department of Energy and Environmental Biotechnology, National Institute of Genetic Engineering and Biotechnology (NIGEB), 14965/161, Tehran, Iran; zolfaghari@nigeb.ac.ir

\*Correspondence: O.TastanBishop@ru.ac.za; Tel: +27-46-603-8072; Fax: +27-46-603-7576

Table S1: List of NCBI accession numbers for each  $\alpha$ -CA selected for the study with initial query sequences highlighted in blue.

| Organism                            | CA abbreviation | Accession number | Sequence length | Query sequence           | Query cover | Sequence identity | E-value     |
|-------------------------------------|-----------------|------------------|-----------------|--------------------------|-------------|-------------------|-------------|
| <i>Camilibacter mediatlanticus</i>  | CmCA            | WP_007474387.1   | 249 aa          | <i>C. mediatlanticus</i> | 100%        | 100%              | $1e^{-156}$ |
| <i>Persephonella marina</i>         | PmCA            | WP_015898908.1   | 243 aa          | <i>P. marina</i>         | 100%        | 100%              | $2e^{-172}$ |
| <i>Thermovibrio ammonificans</i>    | TaCA            | WP_013538320.1   | 247 aa          | <i>T. ammonificans</i>   | 100%        | 100%              | $4e^{-160}$ |
| <i>Geothermobacter</i> sp. EPR-M    | GEprmCA         | WP_139800730     | 231 aa          | <i>P. marina</i>         | 90%         | 52.94%            | $2e^{-149}$ |
| <i>Geothermobacter</i> sp. HR-1     | GHr1CA          | WP_103115889.1   | 246 aa          | <i>P. marina</i>         | 90%         | 51.58%            | $2e^{-150}$ |
| <i>Hydrogenimonas thermophila</i>   | HtCA            | WP_092911809.1   | 249 aa          | <i>T. ammonificans</i>   | 100%        | 48.80%            | $2e^{-81}$  |
| –                                   | LOGACA          | PDB: 6EKI.A      | 226 aa          | <i>P. marina</i>         | 91%         | 81%               | $2e^{-134}$ |
| <i>Nitratiruptor tergarcus</i>      | NtCA            | WP_084275285.1   | 249 aa          | <i>C. mediatlanticus</i> | 100%        | 50.99%            | $4e^{-137}$ |
| <i>Persephonella hydrogeniphila</i> | PhCA            | WP_096999253.1   | 247 aa          | <i>P. marina</i>         | 99%         | 75.00%            | $5e^{-161}$ |
| <i>Sulfurovum lithotrophicum</i>    | SICA            | WP_052746102.1   | 248 aa          | <i>T. ammonificans</i>   | 100%        | 51.21%            | $5e^{-151}$ |
| <i>Sulfurovum</i> sp. NBC37-1       | SNbcCA          | WP_011980858.1   | 248 aa          | <i>T. ammonificans</i>   | 100%        | 50.40%            | $3e^{-150}$ |
| <i>Sulfurovum riftiae</i>           | SrCA            | WP_067332141.1   | 248 aa          | <i>T. ammonificans</i>   | 100%        | 50.20%            | $9e^{-150}$ |
| <i>Vibrio antiquarius</i> (1)       | VaCA1           | WP_006741278.1   | 239 aa          | <i>P. marina</i>         | 99%         | 44.03%            | $4e^{-88}$  |
| <i>Vibrio antiquarius</i> (2)       | VaCA2           | WP_006741954.1   | 239 aa          | <i>P. marina</i>         | 100%        | 48.56%            | $1e^{-146}$ |
| <i>Vibrio diabolicus</i>            | VdCA            | WP_104970467.1   | 239 aa          | <i>P. marina</i>         | 100%        | 47.74%            | $3e^{-146}$ |



Table S2: The residue numbers for important functional residues in the  $\alpha$ -CAs of each organism.

| Carbonic anhydrase | Active site residues |        |        | Proton transfer residues |       |       |       |        |        | CO <sub>2</sub> binding pocket residues |        |        |        | Disulfide bond Cys residues |       |        |
|--------------------|----------------------|--------|--------|--------------------------|-------|-------|-------|--------|--------|-----------------------------------------|--------|--------|--------|-----------------------------|-------|--------|
| CmCA               | His115               | His117 | His134 | His90                    | Tyr29 | Asn88 | Lys93 | Thr201 | Thr202 | Val136                                  | Val146 | Leu200 | Val209 | Trp211                      | Cys48 | Cys205 |
| GEpmCA             | His107               | His109 | His126 | His82                    | Tyr25 | Asn80 | Gln85 | Thr193 | Thr194 | Val128                                  | Val138 | Leu192 | Val201 | Trp203                      | Cys44 | Cys197 |
| GHr1CA             | His96                | His98  | His115 | His71                    | Tyr14 | Asn69 | Gln74 | Thr182 | Thr183 | Val117                                  | Val127 | Leu181 | Val190 | Trp192                      | Cys33 | Cys186 |
| HtCA               | His113               | His115 | His132 | His88                    | Tyr30 | Lys86 | Lys91 | Thr200 | Thr201 | Val134                                  | Val144 | Leu199 | Val208 | Trp210                      | Cys49 | Cys204 |
| LOGACA             | His117               | His119 | His136 | His92                    | Tyr35 | Lys90 | Lys95 | Thr202 | Thr203 | Val138                                  | Val148 | Leu201 | Val210 | Trp212                      | Cys54 | Cys206 |
| NtCA               | His115               | His117 | His134 | His90                    | Tyr33 | Asn88 | Lys93 | Thr201 | Thr202 | Val136                                  | Val146 | Phe200 | Val209 | Trp211                      | Cys52 | Cys205 |
| PmCA               | His107               | His109 | His126 | His82                    | Tyr25 | Asn80 | Lys85 | Thr193 | Thr194 | Val128                                  | Val138 | Leu192 | Val201 | Trp203                      | Cys44 | Cys197 |
| PhCA               | His110               | His112 | His129 | His85                    | Tyr28 | Asn83 | Lys88 | Thr196 | Thr197 | Val131                                  | Val141 | Leu195 | Val204 | Trp206                      | Cys47 | Cys200 |
| SICA               | His112               | His114 | His131 | His87                    | Tyr29 | Asn85 | Gln90 | Thr198 | Thr199 | Val133                                  | Val143 | Leu197 | Val206 | Trp208                      | Cys48 | Cys202 |
| SNbcCA             | His112               | His114 | His131 | His87                    | Tyr29 | Asn85 | Gln90 | Thr198 | Thr199 | Val133                                  | Val143 | Leu197 | Val206 | Trp208                      | Cys48 | Cys202 |
| SrCA               | His113               | His115 | His132 | His88                    | Tyr30 | Asn86 | Gln91 | Thr198 | Thr199 | Val134                                  | Val144 | Leu197 | Val206 | Trp208                      | Cys49 | Cys202 |
| TaCA               | His112               | His114 | His131 | His87                    | Tyr28 | Asn85 | Lys90 | Thr198 | Thr199 | Val133                                  | Val143 | Leu197 | Val206 | Trp208                      | Cys47 | Cys202 |
| VaCA1              | His105               | His107 | His124 | His80                    | Tyr25 | Asn78 | Gln83 | Thr190 | Thr191 | Val126                                  | Val136 | Leu189 | Val198 | Trp200                      | Cys42 | Cys194 |
| VaCA2              | His104               | His106 | His123 | His79                    | Tyr25 | Asn77 | Gln82 | Thr189 | Thr190 | Val125                                  | Val135 | Leu188 | Val197 | Trp199                      | Cys41 | Cys193 |
| VdCA               | His104               | His106 | His123 | His79                    | Tyr25 | Asn77 | Gln82 | Thr189 | Thr190 | Val125                                  | Val135 | Leu188 | Val197 | Trp199                      | Cys41 | Cys193 |

Table S3: Signal peptide cleavage sites prognosticated by various signal peptide predictor programs. The last column shows the first residue number in the modelled chain after removing unavailable structural information from the template.

| Carbonic anhydrase | SignalBLAST cleavage site | Phobius cleavage site | Starting aa in model |
|--------------------|---------------------------|-----------------------|----------------------|
| CmCA               | 25                        | 20                    | 26                   |
| GEpmCA             | -                         | -                     | 22                   |
| GHr1CA             | -                         | -                     | 11                   |
| HtCA               | 21                        | 20                    | 27                   |
| NtCA               | 19                        | 21                    | 30                   |
| PhCA               | 23                        | 20                    | 25                   |
| SICA               | 23                        | 22                    | 26                   |
| SNbcCA             | 23                        | 22                    | 26                   |
| SrCA               | 23                        | 20                    | 27                   |
| VaCA1              | 18                        | 20                    | 22                   |
| VaCA2              | 22                        | 20                    | 22                   |
| VdCA               | 22                        | 20                    | 22                   |

Table S4: Motifs generated by MEME, their positions in the  $\alpha$ -CAs and their respective E-values.

| Organism | Motif number and E-value |                      |                      |                      |                      |                      |                     |                     |                     |                     |                     |                    |                    |                    |
|----------|--------------------------|----------------------|----------------------|----------------------|----------------------|----------------------|---------------------|---------------------|---------------------|---------------------|---------------------|--------------------|--------------------|--------------------|
|          | 1                        | 2                    | 3                    | 4                    | 5                    | 6                    | 7                   | 8                   | 9                   | 10                  | 11                  | 12                 | 13                 | 14                 |
|          | 1.8e <sup>-251</sup>     | 9.9e <sup>-180</sup> | 1.6e <sup>-146</sup> | 7.8e <sup>-146</sup> | 2.4e <sup>-119</sup> | 3.3e <sup>-110</sup> | 7.2e <sup>-77</sup> | 5.4e <sup>-75</sup> | 1.6e <sup>-66</sup> | 7.7e <sup>-28</sup> | 4.6e <sup>-13</sup> | 1.0e <sup>-6</sup> | 1.8e <sup>-4</sup> | 6.9e <sup>-4</sup> |
| CmCA     | 193-212                  | 113-132              | 231-249              | 133-152              | 29-48                | 87-106               | 52-71               | 213-228             | 153-172             | 177-192             | 1-16                | -                  | 22-28              | -                  |
| GEpmCA   | 185-204                  | 105-124              | 224-242              | 125-144              | 25-44                | 79-98                | 48-67               | 205-220             | 145-164             | 169-184             | -                   | 100-104            | 18-24              | -                  |
| GHr1CA   | 174-193                  | 94-113               | 213-231              | 114-133              | 14-33                | 68-87                | 37-56               | 194-209             | 134-153             | 158-173             | -                   | 89-93              | 7-13               | -                  |
| HtCA     | 192-211                  | 111-130              | 231-249              | 131-150              | 30-49                | 85-104               | 53-72               | 212-227             | 151-170             | 176-191             | 1-16                | 106-110            | 23-29              | -                  |
| LOGACA   | 167-186                  | 88-107               | 206-244              | 108-127              | 8-27                 | 62-81                | 31-50               | 187-202             | 128-147             | 151-166             | -                   | 83-87              | 1-7                | -                  |
| NtCA     | 193-212                  | 113-132              | 231-249              | 133-152              | 33-52                | 87-106               | 56-75               | 213-228             | 153-172             | 177-192             | 1-16                | -                  | 26-32              | -                  |
| PhCA     | 188-207                  | 108-127              | 227-245              | 128-147              | 28-47                | 82-101               | 51-70               | 208-223             | 148-167             | 172-187             | 1-16                | 103-107            | 21-27              | -                  |
| PmCA     | 185-204                  | 105-124              | 224-242              | 125-144              | 25-44                | 79-98                | 48-67               | 205-220             | 145-164             | 169-184             | 1-16                | 100-104            | 18-24              | -                  |
| SICA     | 190-209                  | 110-129              | 229-247              | 130-149              | 29-48                | 84-103               | 52-71               | 210-225             | 150-169             | 174-189             | 1-16                | 105-109            | 22-28              | 72-83              |
| SNbcCA   | 190-209                  | 110-129              | 229-247              | 130-149              | 29-48                | 84-103               | 52-71               | 210-225             | 150-169             | 174-189             | 1-16                | 105-109            | 22-28              | 72-83              |
| SrCA     | 190-209                  | 111-130              | 229-247              | 131-150              | 30-49                | 85-104               | 53-72               | 210-225             | 151-170             | 174-189             | 1-16                | 106-110            | 23-29              | 73-84              |
| TaCA     | 190-209                  | 110-129              | 229-247              | 130-149              | 28-47                | 84-103               | 51-70               | 210-225             | 150-169             | 174-189             | 1-16                | 105-109            | 21-27              | -                  |
| VaCA1    | 182-201                  | 103-122              | 220-238              | 123-142              | 26-45                | 77-96                | 46-65               | 202-217             | 143-162             | 166-181             | 1-16                | 98-102             | 18-24              | -                  |
| VaCA2    | 181-200                  | 102-121              | 219-237              | 122-141              | 25-44                | 76-95                | 45-64               | 201-216             | 142-161             | 165-180             | 1-16                | 97-101             | 18-24              | -                  |
| VdCA     | 181-200                  | 102-121              | 219-237              | 122-141              | 25-44                | 76-95                | 45-64               | 201-216             | 142-161             | 165-180             | 1-16                | 97-101             | 18-24              | -                  |

Table S5: Template coverage, sequence identity and model validation for  $\alpha$ -CA sequences.

| Organism | Template PDB ID | Sequence identity (%) | Sequence coverage (%) | z-Dope score | Verify3D (%) | ProSA (z-score) | PROCHECK                 |                      |
|----------|-----------------|-----------------------|-----------------------|--------------|--------------|-----------------|--------------------------|----------------------|
|          |                 |                       |                       |              |              |                 | Most favoured region (%) | Disallowed region(%) |
| CmCA     | LOGACA          | 49                    | 89                    | -1.11        | 91           | -7.76           | 89.6                     | 0                    |
| GEprmCA  |                 | 52                    | 90                    | -1.04        | 88.2         | -6.55           | 91.8                     | 0                    |
| GHr1CA   |                 | 51                    | 95                    | -1.05        | 95.2         | -6.32           | 92.7                     | 0                    |
| HtCA     |                 | 49                    | 88                    | -0.82        | 80.7         | -7.46           | 87.6                     | 1.3                  |
| NtCA     |                 | 52                    | 88                    | -1.08        | 83.4         | -6.73           | 90.9                     | 0.3                  |
| PhCA     |                 | 84                    | 89                    | -1.42        | 96.4         | -7.2            | 91.4                     | 0                    |
| SlCA     |                 | 48                    | 88                    | -1.04        | 89           | -6.59           | 89.9                     | 0                    |
| SNbcCA   |                 | 47                    | 88                    | -1.0         | 85.2         | -6.57           | 89.4                     | 0.5                  |
| SrCA     |                 | 49                    | 88                    | -1.13        | 92.1         | -6.85           | 89.5                     | 0                    |
| VaCA1    |                 | 50                    | 90                    | -1.11        | 91.7         | -6.65           | 89.3                     | 0.8                  |
| VaCA2    |                 | 50                    | 91                    | -0.79        | 89.7         | -6.29           | 90.2                     | 0.8                  |
| VdCA     |                 | 50                    | 91                    | -0.81        | 90.1         | -6.32           | 89                       | 0                    |

Table S6: Residues confirmed by at least three of the interface prediction servers to be found in the interface of  $\alpha$ -CAs in this study. Hotspot residues are shown in bold.

| CA     | Interface residues                                                                                                                                                                                                                                                                                                                                                                                                                                                                                                                                                                                                                                                                                                                                                                                                                                                          |
|--------|-----------------------------------------------------------------------------------------------------------------------------------------------------------------------------------------------------------------------------------------------------------------------------------------------------------------------------------------------------------------------------------------------------------------------------------------------------------------------------------------------------------------------------------------------------------------------------------------------------------------------------------------------------------------------------------------------------------------------------------------------------------------------------------------------------------------------------------------------------------------------------|
| CmCA   | <b>Chain A:</b> Q46, M47, I50, G51, K52, <b>N53</b> , T64, Q65, <b>F67</b> , N68, T69, N70, L71, K72, D105, N143, R195, N197, G198, S206, <b>E207</b> , G208, V209, R210, N243, A244, R245, <b>V246</b> , <b>L248</b><br><b>Chain B:</b> Q46, M47, I50, G51, K52, <b>N53</b> , S63, T64, Q65, <b>F67</b> , N68, T69, N70, L71, K72, D105, N143, R195, F171, N197, S206, <b>E207</b> , G208, V209, R210, N243, A244, R245, V246, L248                                                                                                                                                                                                                                                                                                                                                                                                                                        |
| GEpmCA | <b>Chain A:</b> I43, S46, G47, R48, <b>N49</b> , <b>V59</b> , D60, A61, E62, L63, P64, D97, <b>R187</b> , F188, N189, Q199, G200, V201, I202, N236, <b>A237</b> , R238, L239, <b>L241</b><br><b>Chain B:</b> I43, S46, R48, <b>N49</b> , V59, D60, A61, E62, L63, P64, D97, R99, N135, <b>R187</b> , F188, N189, S198, <b>Q199</b> , G200, V201, I202, L235, N236, A237, R238, L239, <b>L241</b>                                                                                                                                                                                                                                                                                                                                                                                                                                                                            |
| GHr1CA | <b>Chain A:</b> I32, S35, G36, R37, <b>N38</b> , R45, V48, D49, A50, E51, L52, P53, D86, N124, R176, F177, N178, S187, <b>Q188</b> , G189, V190, I191, N225, <b>A226</b> , R227, L228, <b>L230</b><br><b>Chain B:</b> I32, S35, G36, R37, <b>N38</b> , <b>V48</b> , D49, A50, E51, L52, P53, D86, R88, N124, R176, F177, N178, S187, <b>Q188</b> , G189, V190, I191, N225, A226, <b>R227</b> , L228, <b>L230</b>                                                                                                                                                                                                                                                                                                                                                                                                                                                            |
| HtCA   | <b>Chain A:</b> E47, M48, I51, G52, K53, <b>N54</b> , T62, Q63, <b>Y66</b> , D67, V68, D69, L70, E71, D103, Q141, R194, Y195, N196, T205, <b>E206</b> , G207, V208, R209, N243, A244, R245, V246, L248<br><b>Chain B:</b> E47, M48, I51, G52, K53, <b>N54</b> , T62, <b>Y66</b> , D67, V68, D69, L70, E71, D103, Q141, R194, Y195, N196, G197, <b>E206</b> , G207, V208, <b>R209</b> , I242, N243, A244, <b>R245</b> , V246, L248                                                                                                                                                                                                                                                                                                                                                                                                                                           |
| LOGACA | <b>Chain A:</b> I52, M53, I56, G57, K58, N59, R67, <b>V69</b> , E70, A71, E72, L73, D107, I109, N145, R196, Y197, S198, G199, S207, E208, G209, V210, R211, N245, <b>A246</b> , R247, <b>M248</b> , <b>M250</b> , D253<br><b>Chain B:</b> N49, I52, M53, I56, G57, K58, N59, R67, <b>V69</b> , E70, A71, E72, L73, D107, I109, N145, R196, Y197, S198, G199, S207, <b>E208</b> , G209, V210, <b>R211</b> , N245, <b>A246</b> , R247, M248, M250, D253                                                                                                                                                                                                                                                                                                                                                                                                                       |
| NtCA   | <b>Chain A:</b> P47, R50, M51, F54, G55, <b>V56</b> , <b>N57</b> , R65, I67, E68, A69, K70, L71, P72, D105, I107, E143, R195, Y196, D197, <b>E207</b> , G208, V209, <b>R210</b> , H243, A244, <b>R245</b> , V246, L248<br><b>Chain B:</b> P47, R50, M51, F54, G55, <b>V56</b> , <b>N57</b> , R65, I67, E68, A69, K70, L71, P72, D105, I107, E143, R195, Y196, D197, T206, E207, G208, V209, <b>R210</b> , H243, A244, <b>R245</b> , V246, L248                                                                                                                                                                                                                                                                                                                                                                                                                              |
| PhCA   | <b>Chain A:</b> I45, M46, I49, G50, K51, <b>N52</b> , R60, A62, E63, A64, D65, L66, D100, I102, N138, R190, Y191, S192, <b>E202</b> , G203, V204, <b>R205</b> , N239, A240, <b>R241</b> , M242, I243, L244, D247<br><b>Chain B:</b> D42, I45, M46, I49, G50, K51, <b>N52</b> , R60, A62, E63, A64, D65, L66, D100, G101, I102, N138, R190, Y191, S192, S201, <b>E202</b> , G203, V204, R205, N239, A240, R241, M242, I243, L244, D247                                                                                                                                                                                                                                                                                                                                                                                                                                       |
| PmCA   | <b>Chain A:</b> I42, M43, I46, G47, K48, <b>N49</b> , R57, V59, D60, A71, K62, L63, D97, I99, N135, R187, Y188, S189, E199, G200, V201, <b>R202</b> , N236, <b>A237</b> , <b>R238</b> , M239, M241<br><b>Chain B:</b> D39, I42, M43, I46, G47, K48, <b>N49</b> , R57, <b>V59</b> , D60, A71, K62, L63, D97, I99, N135, R187, Y188, S189, S198, <b>E199</b> , G200, V201, R202, N236, <b>A237</b> , R238, M239, M241                                                                                                                                                                                                                                                                                                                                                                                                                                                         |
| SICA   | <b>Chain A:</b> H46, M47, E50, G51, L52, <b>N53</b> , H61, S62, S64, D65, P66, N67, H68, D102, N140, R192, F193, N194, E204, G205, V206, R207, D241, <b>A242</b> , <b>R243</b> , V244, V246<br><b>Chain B:</b> E43, H46, M47, E50, G51, L52, <b>N53</b> , H61, S62, S64, D65, P66, N67, H68, D102, N140, <b>R192</b> , F193, N194, <b>E204</b> , G205, V206, R207, D241, <b>A242</b> , <b>R243</b> , V244, V246                                                                                                                                                                                                                                                                                                                                                                                                                                                             |
| SNbcCA | <b>Chain A:</b> H46, M47, E50, G51, L52, <b>N53</b> , H61, S62, S64, D65, P66, N67, H68, D102, D140, R192, F193, N194, G195, T203, E204, G205, V206, R207, D241, <b>A242</b> , <b>R243</b> , V244, V246<br><b>Chain B:</b> E43, H46, M47, E50, L52, <b>N53</b> , H61, S62, S64, D65, P66, N67, H68, D102, D140, R192, F193, N194, T203, E204, G205, V206, R207, D241, <b>A242</b> , <b>R243</b> , V244, V246                                                                                                                                                                                                                                                                                                                                                                                                                                                                |
| SrCA   | <b>Chain A:</b> H47, Q48, D51, L53, <b>N54</b> , H62, S63, I64, T65, D66, P67, D68, H69, K70, D103, D141, <b>R192</b> , F193, N194, T203, <b>E204</b> , G205, V206, R207, D241, <b>A242</b> , R243, V244, V246<br><b>Chain B:</b> H47, Q48, D51, G52, L53, <b>N54</b> , H62, T65, D66, P67, D68, H69, K70, D103, D141, R192, F193, N194, T203, <b>E204</b> , G205, V206, R207, D241, <b>A242</b> , <b>R243</b> , V244, V246                                                                                                                                                                                                                                                                                                                                                                                                                                                 |
| TaCA   | <b>Chain A:</b> L45, M46, I49, G50, K51, <b>N52</b> , <b>V64</b> , K65, A66, C67, L68, D102, N140, D189, R192, Y193, S194, G195, S203, E204, G205, V206, R207, N241, <b>A242</b> , <b>R243</b> , K244, <b>M246</b> , K247<br><b>Chain B:</b> L45, M46, I49, G50, K51, <b>N52</b> , <b>V64</b> , K65, A66, C67, L68, D102, D189, <b>R192</b> , Y193, S194, S203, E204, G205, V206, R207, N241, A242, R243, K244, <b>M246</b> , K247<br><b>Chain C:</b> L45, M46, I49, G50, K51, <b>N52</b> , <b>V64</b> , K65, A66, C67, L68, D102, N140, D189, <b>R192</b> , Y193, S194, Y168, S203, E204, G205, V206, R207, N241, <b>A242</b> , <b>R243</b> , K244, <b>M246</b> , K247<br><b>Chain D:</b> L45, M46, I49, K51, <b>N52</b> , <b>V64</b> , K65, A66, C67, L68, D102, D189, <b>R192</b> , Y193, S194, S203, E204, G205, V206, R207, N241, A242, R243, K244, <b>M246</b> , K247 |
| VaCA1  | <b>Chain A:</b> K40, D41, T45, <b>K46</b> , <b>N47</b> , N55, A57, D58, A59, K60, L61, D95, E133, R184, N186, S195, <b>E196</b> , G197, V198, R199, <b>N232</b> , <b>A233</b> , R234, V235, L237, N239<br><b>Chain B:</b> K40, T44, T45, K46, <b>N47</b> , N55, A57, D58, A59, K60, L61, D95, E133, R184, F185, N186, S195, <b>E196</b> , G197, V198, R199, N232, <b>A233</b> , R234, V235, <b>L237</b> , N239                                                                                                                                                                                                                                                                                                                                                                                                                                                              |
| VaCA2  | <b>Chain A:</b> K43, G44, Q45, <b>N46</b> , S54, A56, E57, A58, K59, L60, D94, H132, R183, F184, N185, S194, <b>E195</b> , G196, V197, R198, N231, <b>A232</b> , R233, <b>M234</b> , L236, H239<br><b>Chain B:</b> <b>Q45</b> , <b>N46</b> , S54, A56, E57, A58, K59, L60, D94, H132, R183, F184, <b>N185</b> , S194, <b>E195</b> , G196, V197, R198, N231, <b>A232</b> , R233, <b>M234</b> , <b>L236</b>                                                                                                                                                                                                                                                                                                                                                                                                                                                                   |
| VdCA   | <b>Chain A:</b> S39, K43, G44, <b>Q45</b> , <b>N46</b> , S54, A56, E57, A58, K59, L60, D94, H132, R183, N185, G186, S194, <b>E195</b> , G196, V197, R198, N231, <b>A232</b> , <b>R233</b> , M234, L236<br><b>Chain B:</b> S39, K43, <b>Q45</b> , <b>N46</b> , S54, A56, E57, A58, K59, L60, D94, H132, R183, F184, N185, S194, <b>E195</b> , G196, V197, R198, N231, <b>A232</b> , R233, <b>M234</b> , L236                                                                                                                                                                                                                                                                                                                                                                                                                                                                 |

Table S7: Interface characteristics of the multimeric structures of  $\alpha$ -CAs.

| Organism                         | Hydrogen bonds |     | Salt bridges |     | Buried surface area/ $\text{\AA}^2$ | Total surface area/ $\text{\AA}^2$ | % BSA |
|----------------------------------|----------------|-----|--------------|-----|-------------------------------------|------------------------------------|-------|
|                                  | PDBePISA       | PIC | PDBePISA     | PIC |                                     |                                    |       |
| CmCA                             | 13             | 19  | –            | –   | 2095                                | 22277                              | 9.4   |
| GEprmCA                          | 7              | 16  | –            | –   | 1670                                | 21424                              | 7.8   |
| GHr1CA                           | 8              | 22  | –            | –   | 1677                                | 21425                              | 7.8   |
| HtCA                             | 18             | 22  | –            | –   | 2083                                | 22199                              | 9.4   |
| LOGACA                           | 10             | 22  | 8            | 2   | 2062                                | 21158                              | 9.5   |
| NtCA                             | 12             | 24  | 7            | 4   | 1944                                | 21981                              | 8.8   |
| PhCA                             | 11             | 22  | 7            | 2   | 1967                                | 21334                              | 9.2   |
| PmCA                             | 10             | 20  | 8            | 4   | 2011                                | 21636                              | 9.3   |
| SICA                             | 13             | 22  | 2            | 1   | 1896                                | 21635                              | 8.8   |
| SNbcCA                           | 14             | 22  | 2            | 1   | 1793                                | 21941                              | 7.9   |
| SrCA                             | 12             | 13  | –            | –   | 1785                                | 21584                              | 8.3   |
| VaCA1                            | 12             | 21  | 3            | 2   | 1881                                | 21433                              | 8.8   |
| VaCA2                            | 14             | 24  | –            | –   | 1766                                | 21233                              | 8.3   |
| VdCA                             | 12             | 28  | –            | –   | 1725                                | 21059                              | 8.2   |
| TaCA (dimer 1)                   | 8              | 15  | –            | 1   | 1820                                | 42781                              | 4.2   |
| TaCA (dimer 2)                   | 8              | 12  | 2            | 2   | 1784                                | 42781                              | 4.2   |
| TaCA (Tetramerization interface) | 12             | 8   | –            | –   | 698                                 | 42781                              | 1.6   |

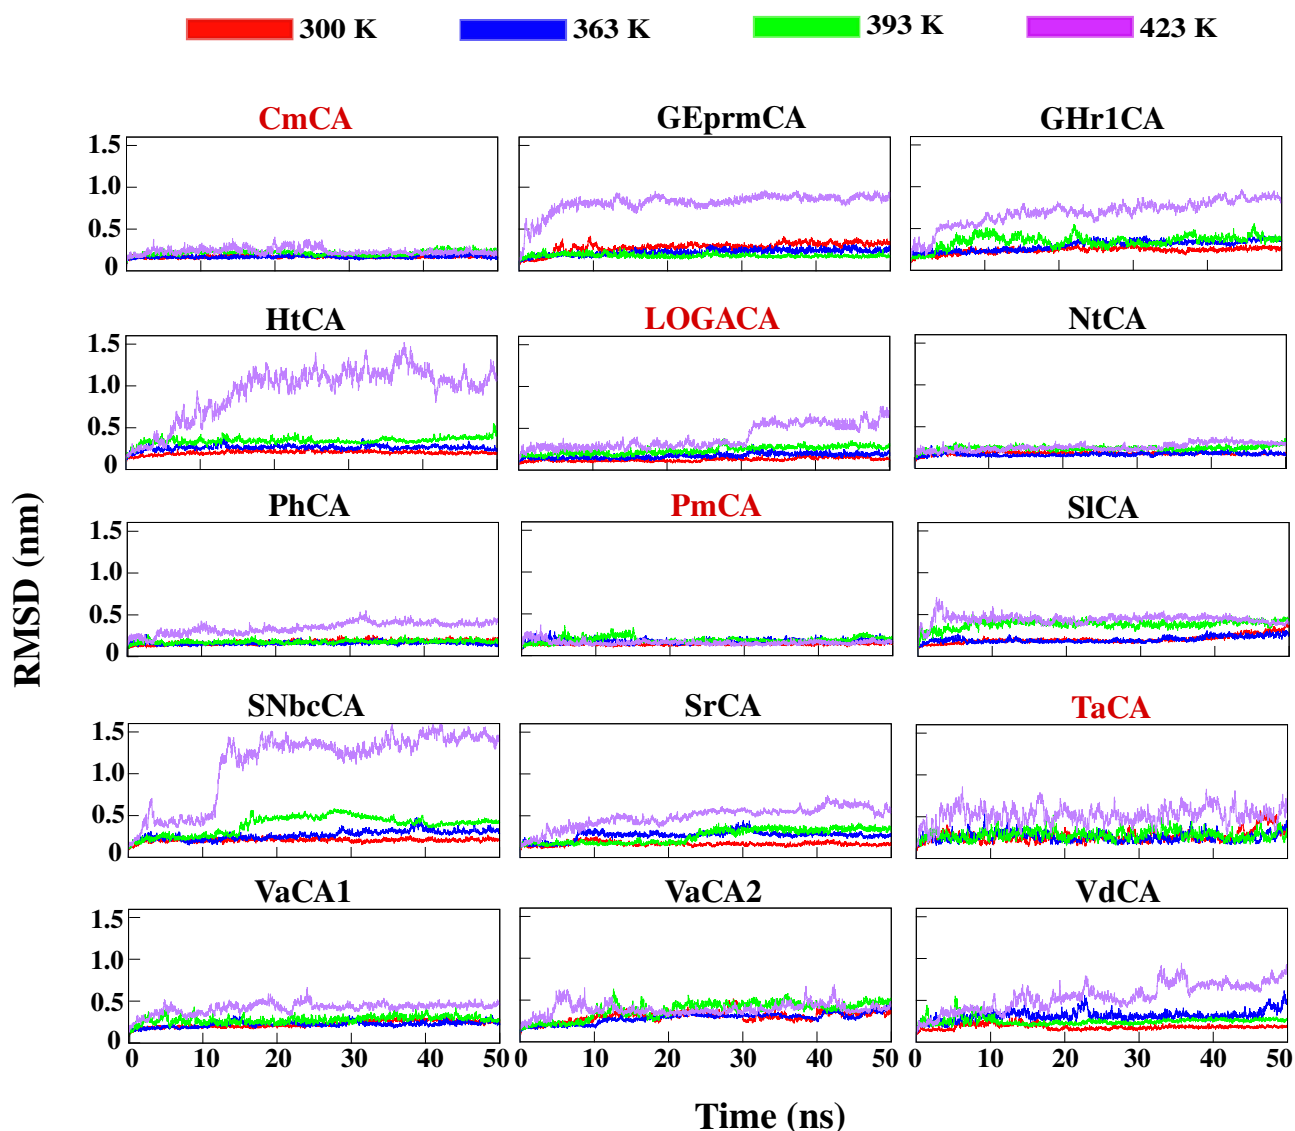

Figure S1: RMSD of the  $\alpha$ -CA proteins simulated at 300 K, 363 K, 393 K and 423 K. CmCA, LOGACA, PmCA and TaCA which have been previously characterized, are labelled in red.

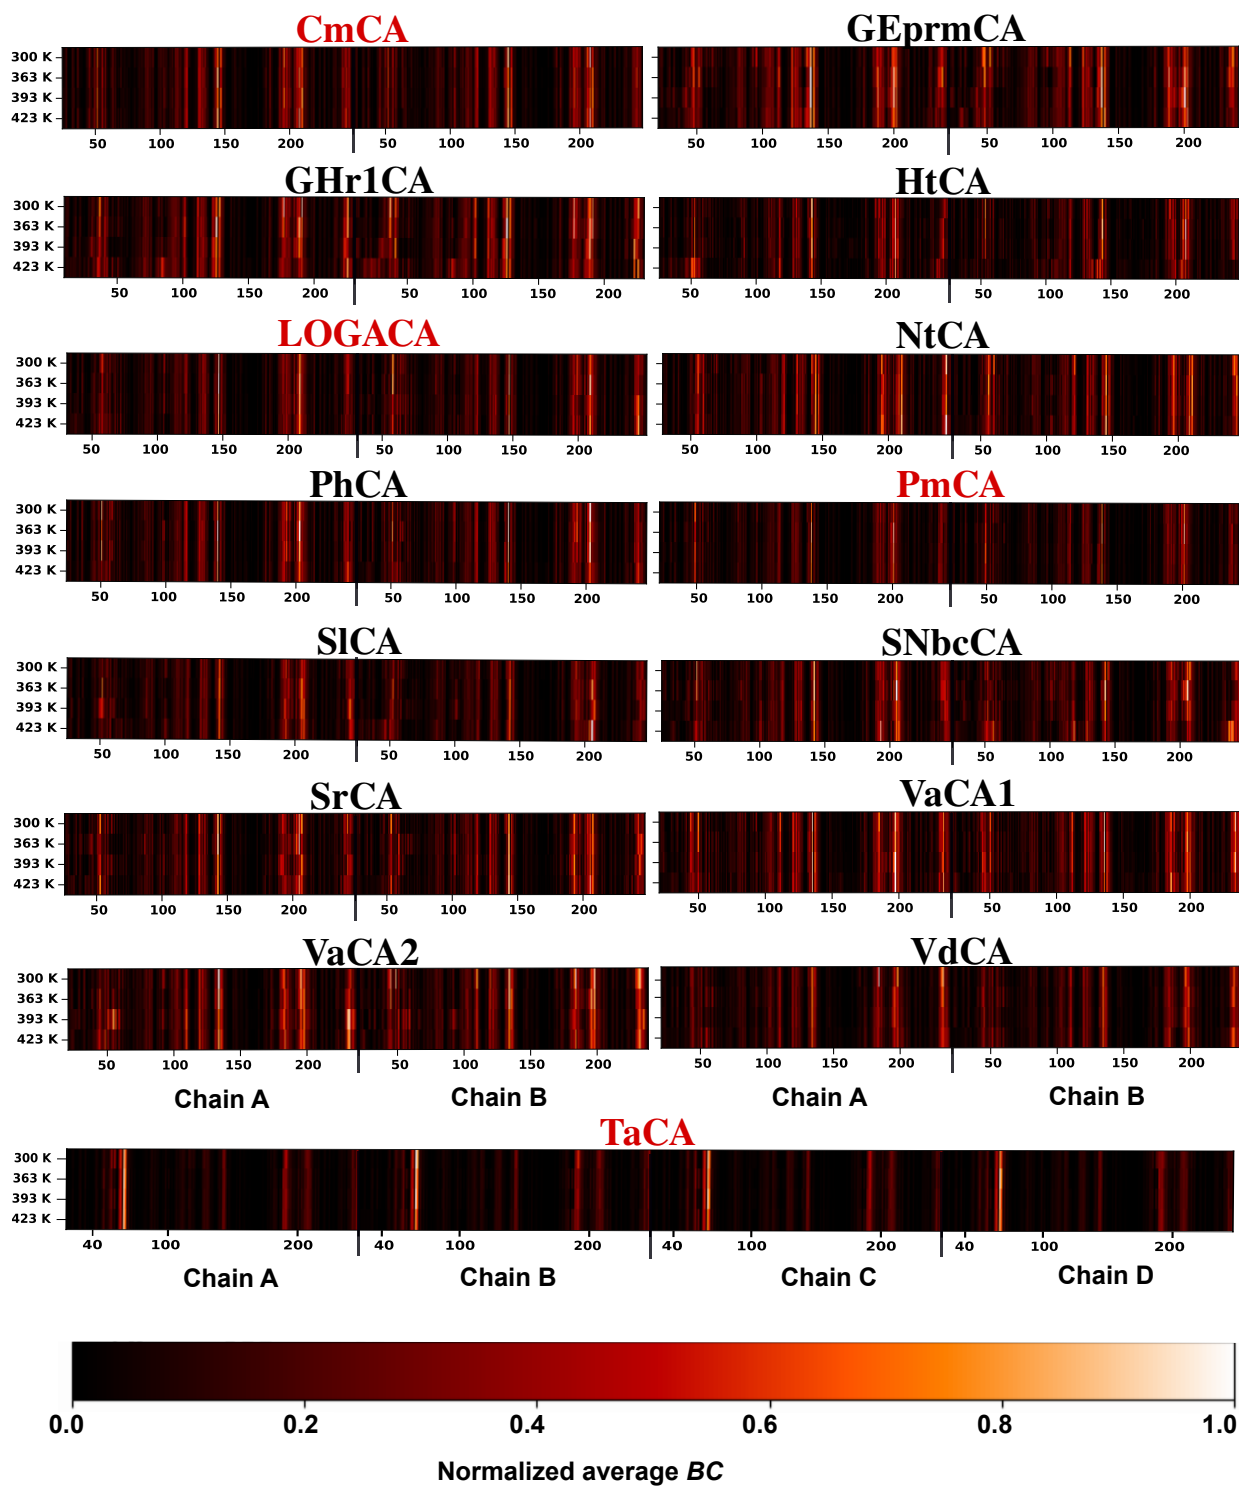

Figure S2: Average  $BC$ s of residues of the  $\alpha$ -CA proteins simulated at 300 K, 363 K, 393 K and 423 K. The average  $BC$ s were normalized across the temperatures for each protein separately. CmCA, LOGACA, PmCA and TaCA which have been previously characterized, are labelled in red.

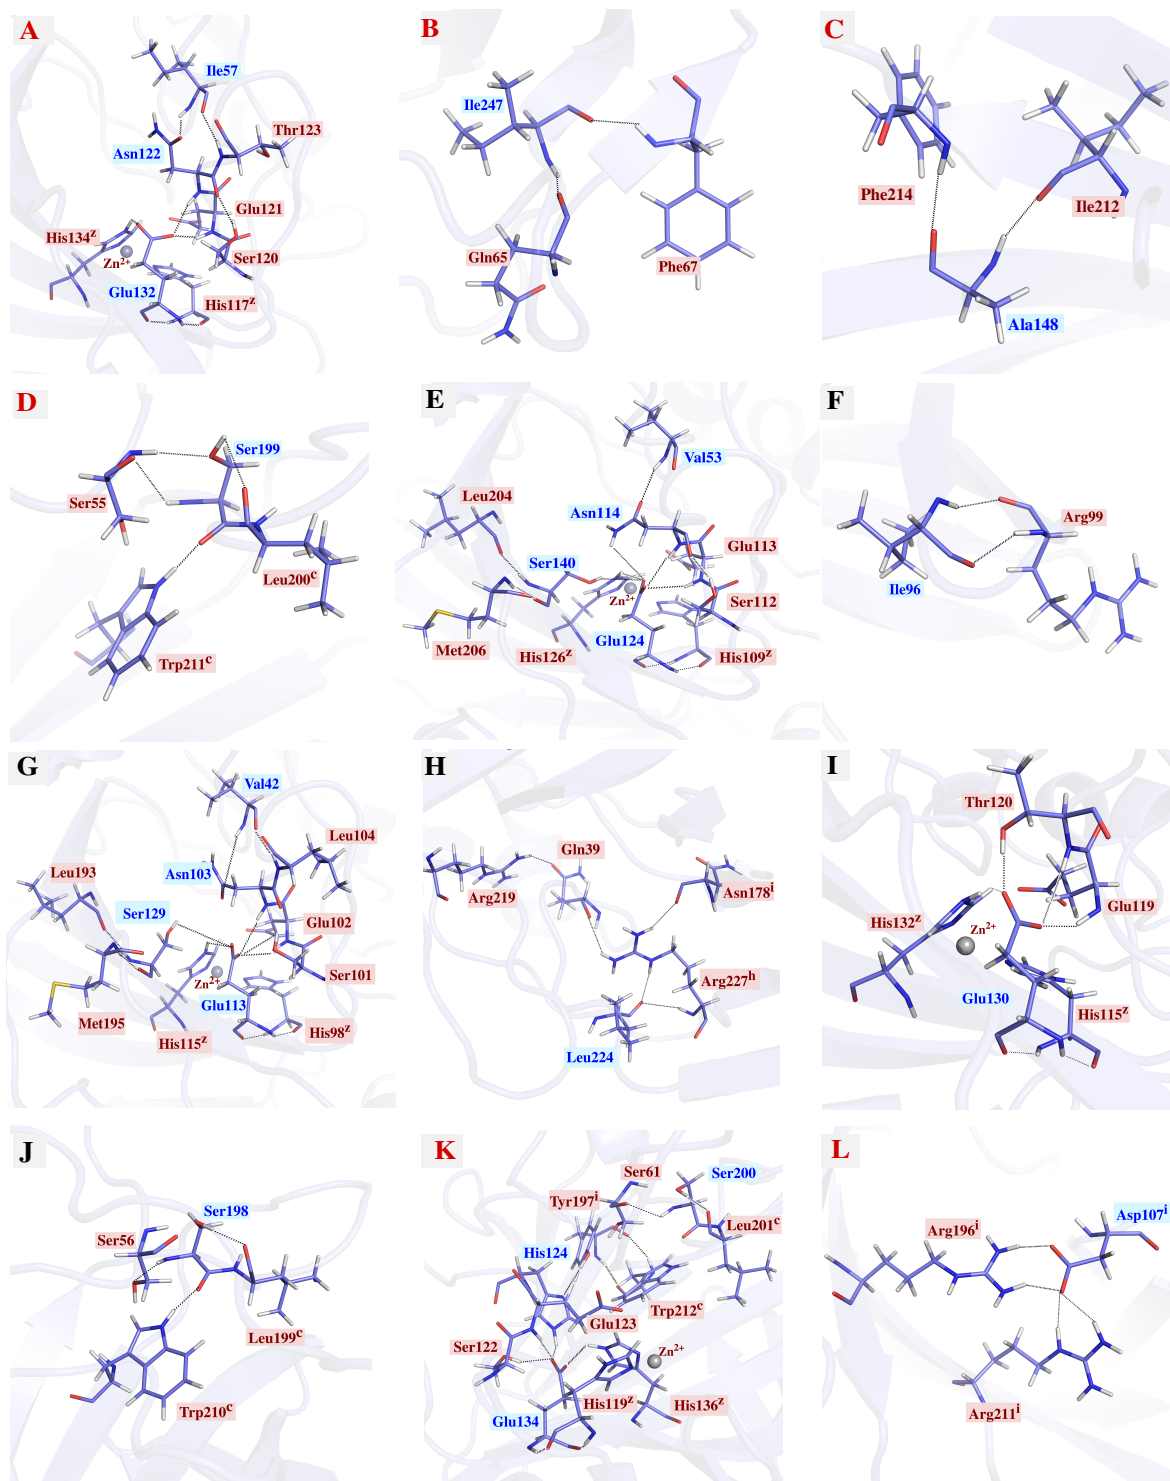

Figure S3: Intra-subunit hydrogen bond networks of CmCA (A-D), GEprnCA (E and F), GHr1CA (G and H), HtCA (I and J) and LOGACA (K and L) through high usage residues, labelled blue. Functional residues are annotated as follows: hotspot residues - h; interface residues - i; CO<sub>2</sub> binding pocket residues - c; Zn<sup>2+</sup> coordinating residues - z. CmCA and LOGACA which have been previously characterized, are labelled in red.

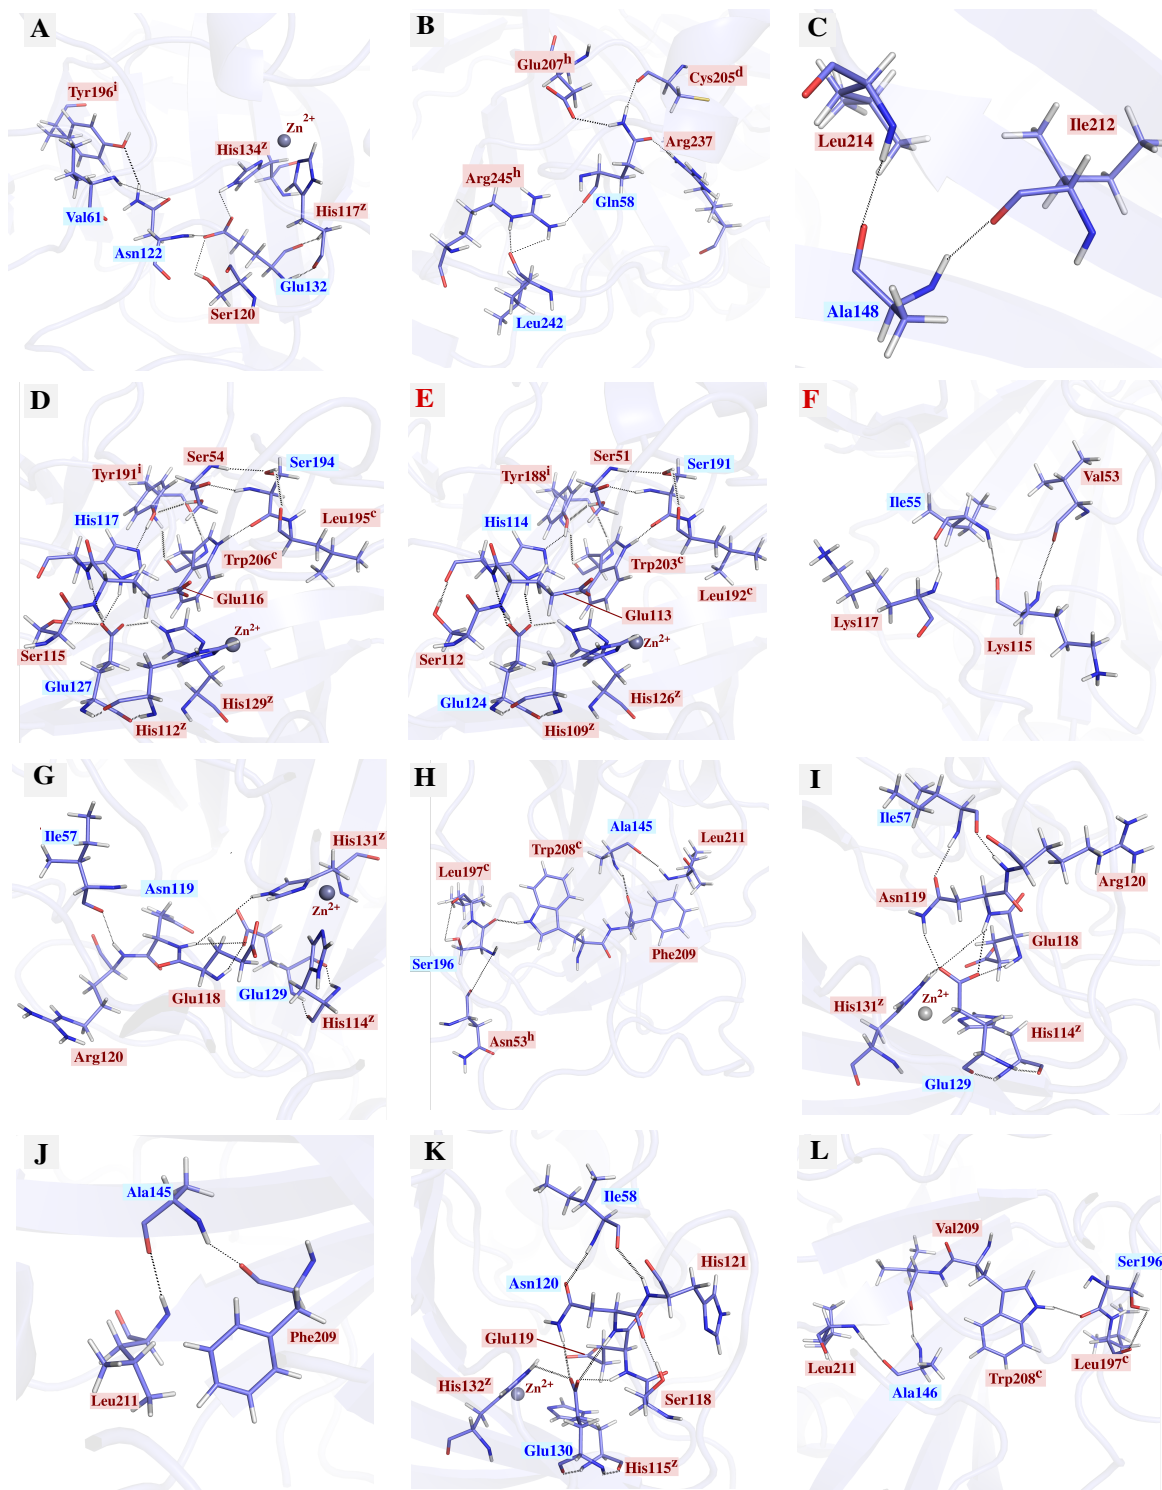

Figure S4: Intra-subunit hydrogen bond networks of NtCA (A-C), PhCA (D), PmCA (E and F), SICA (G and H), SNbcCA (I and J) and SrCA (K and L) through high usage residues, labelled blue. Hotspot residues and CO<sub>2</sub> binding pocket residues are annotated h and c respectively. Functional residues are annotated as follows: hotspot residues - h; interface residues - i; intra-subunit disulfide Cys residues - d; CO<sub>2</sub> binding pocket residues - c; Zn<sup>2+</sup> coordinating residues - z. PmCA which has been previously characterized, is labelled in red.



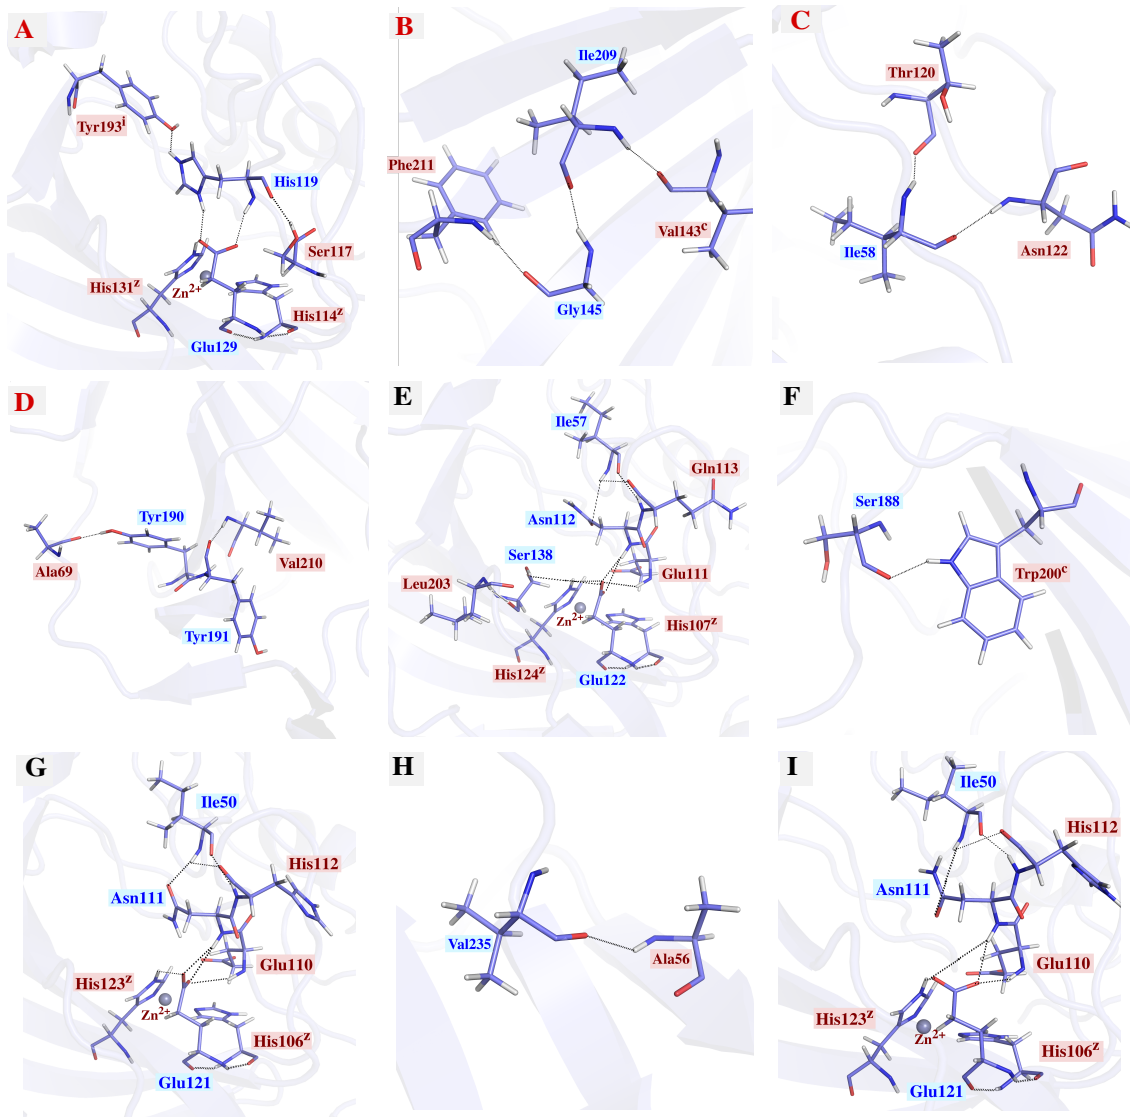

Figure S5: Intra-subunit hydrogen bond networks of TaCA (A-D), VaCA1 (E and F) and VaCA2 (G and H) and VdCA (I) through high usage residues, labelled blue. Hotspot residues and CO<sub>2</sub> binding pocket residues are annotated h and c respectively. Functional residues are annotated as follows: hotspot residues - h; interface residues - i; CO<sub>2</sub> binding pocket residues - c; Zn<sup>2+</sup> coordinating residues - z. TaCA which has been previously characterized, is labelled in red.



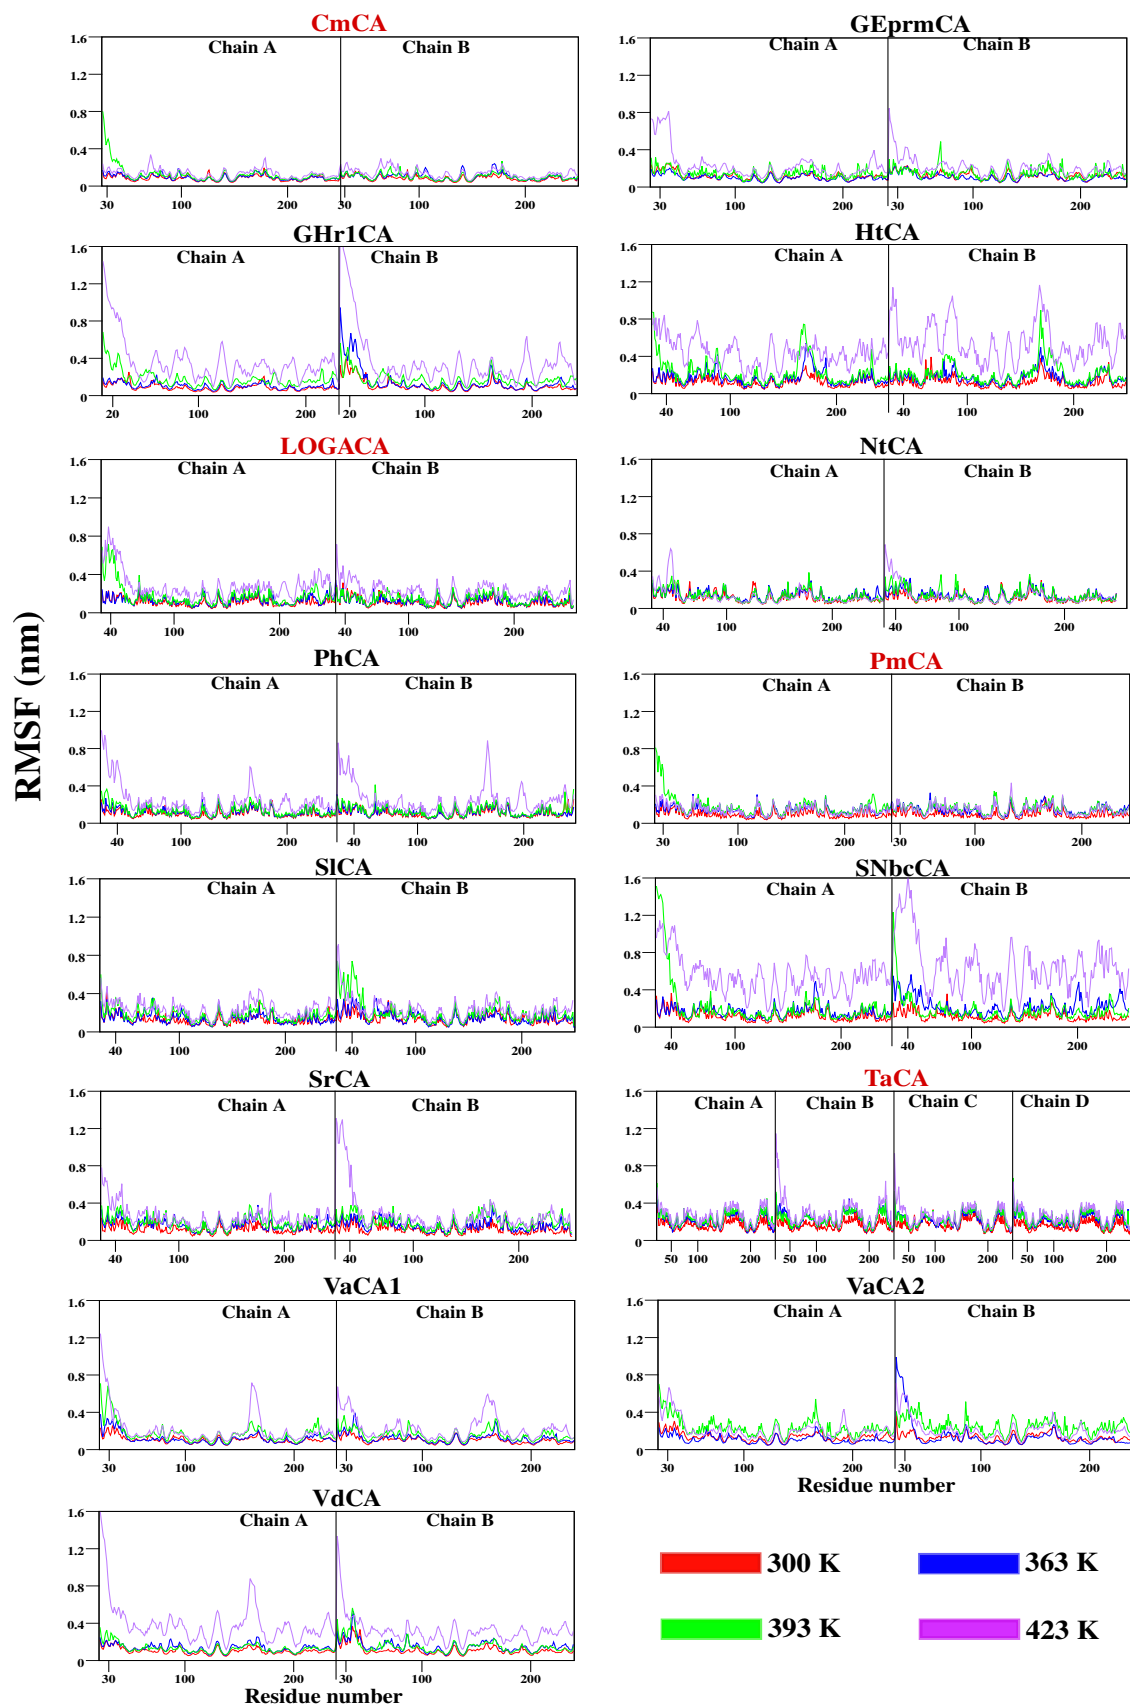

Figure S6: RMSF of protein structures at 300 K, 363 K, 393 K and 423 K. CmCA, LOGACA, PmCA and TaCA which have been previously characterized, are labelled in red.

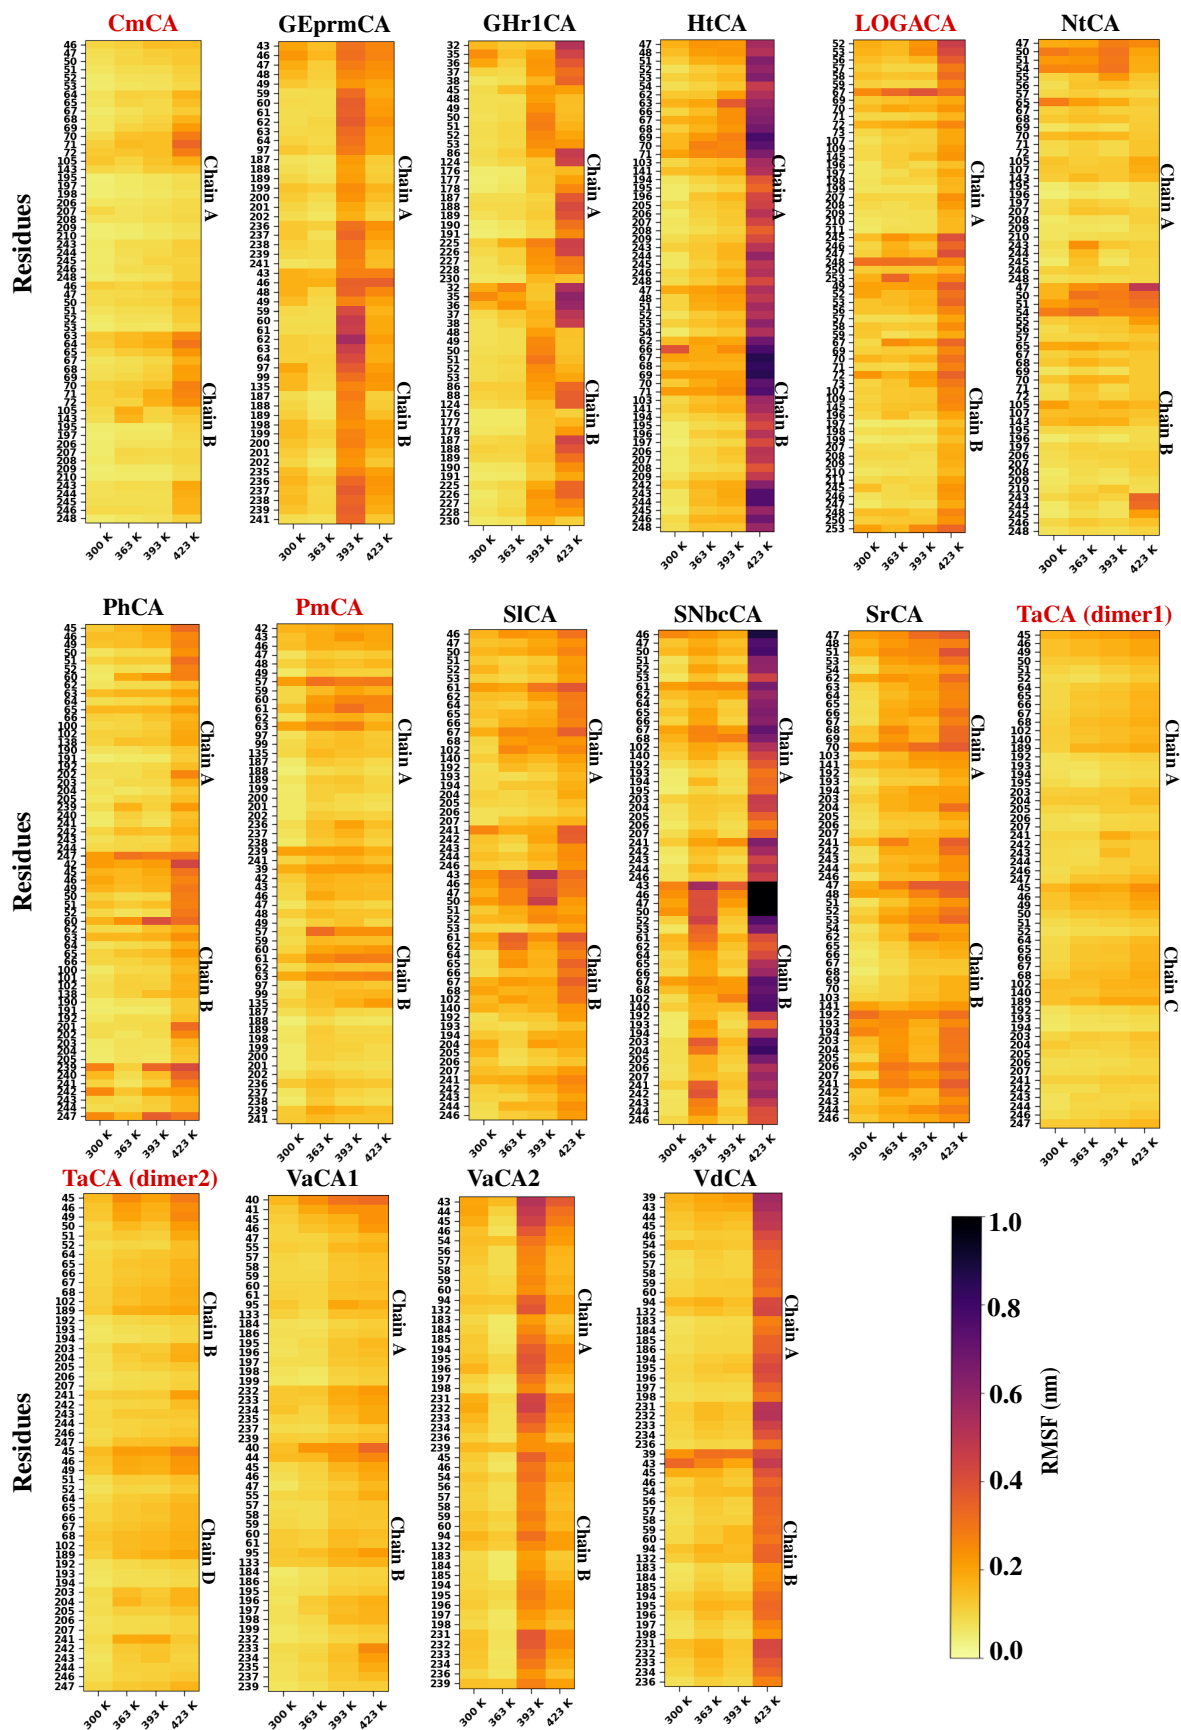

Figure S7: RMSF of interface residues of the  $\alpha$ -CA proteins simulated at 300 K, 363 K, 393 K and 423 K. CmCA, LOGACA, PmCA and TaCA which have been previously characterized, are labelled in red.

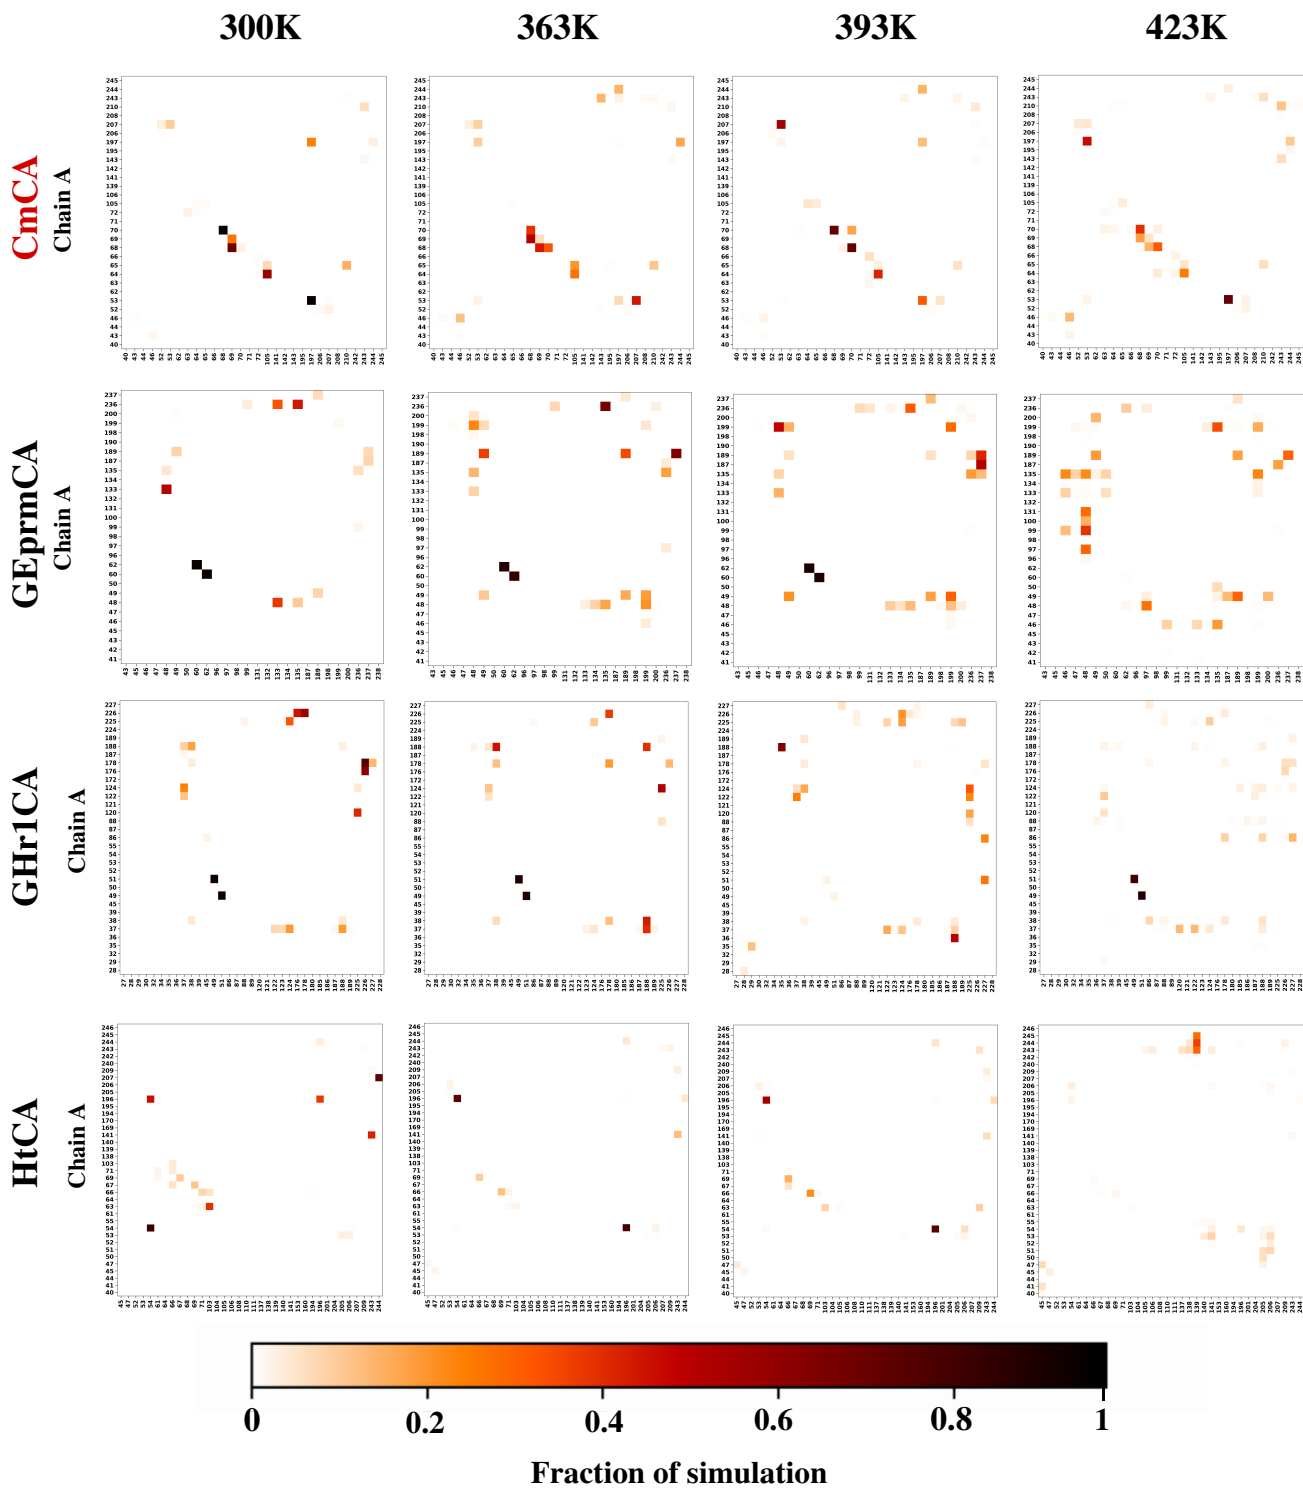

Figure S8: Inter-subunit hydrogen bonds networks of CmCA, GEprmCA, GHR1CA and HtCA at 300 K, 363 K, 393 K and 423 K. CmCA which has been previously characterized, is labelled in red.

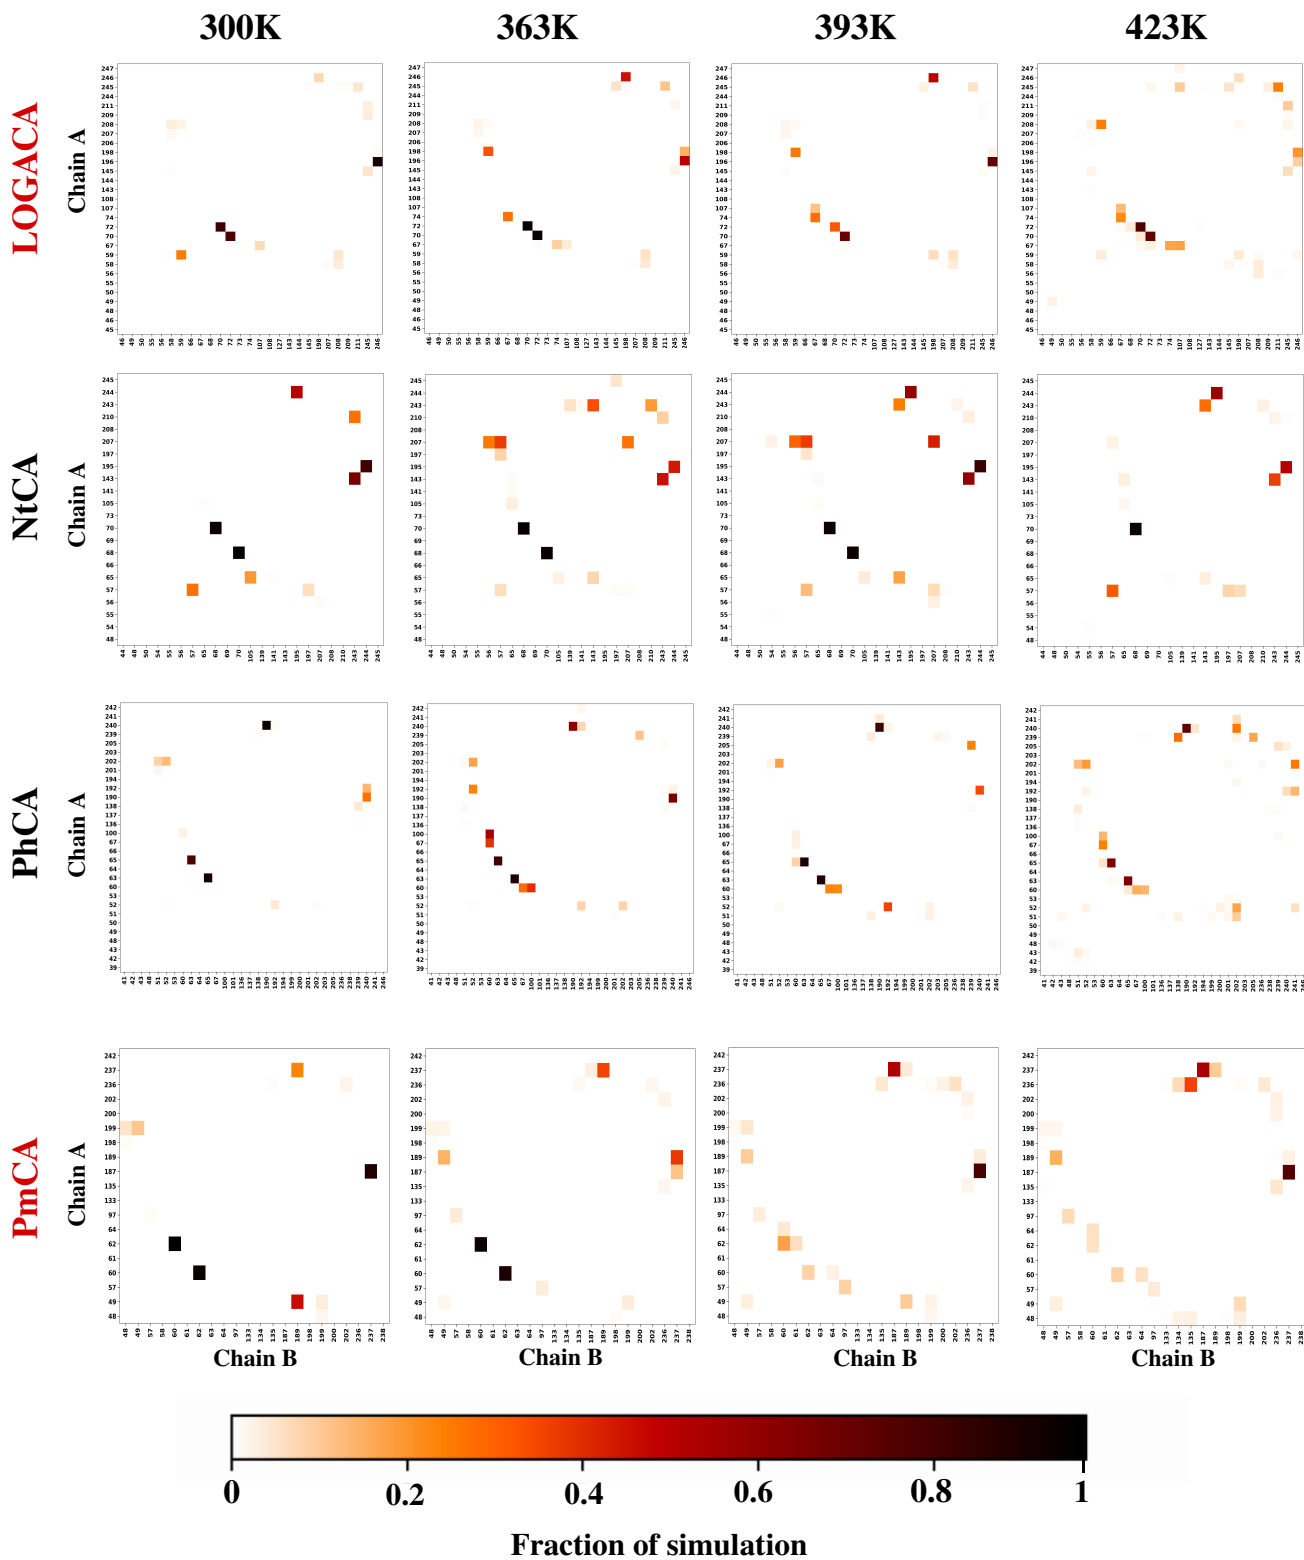

Figure S9: Inter-subunit hydrogen bonds of LOGACA, NtCA, PhCA and PmCA at 300 K, 363 K, 393 K and 423 K. LOGACA and PmCA which have been previously characterized, are labelled in red.

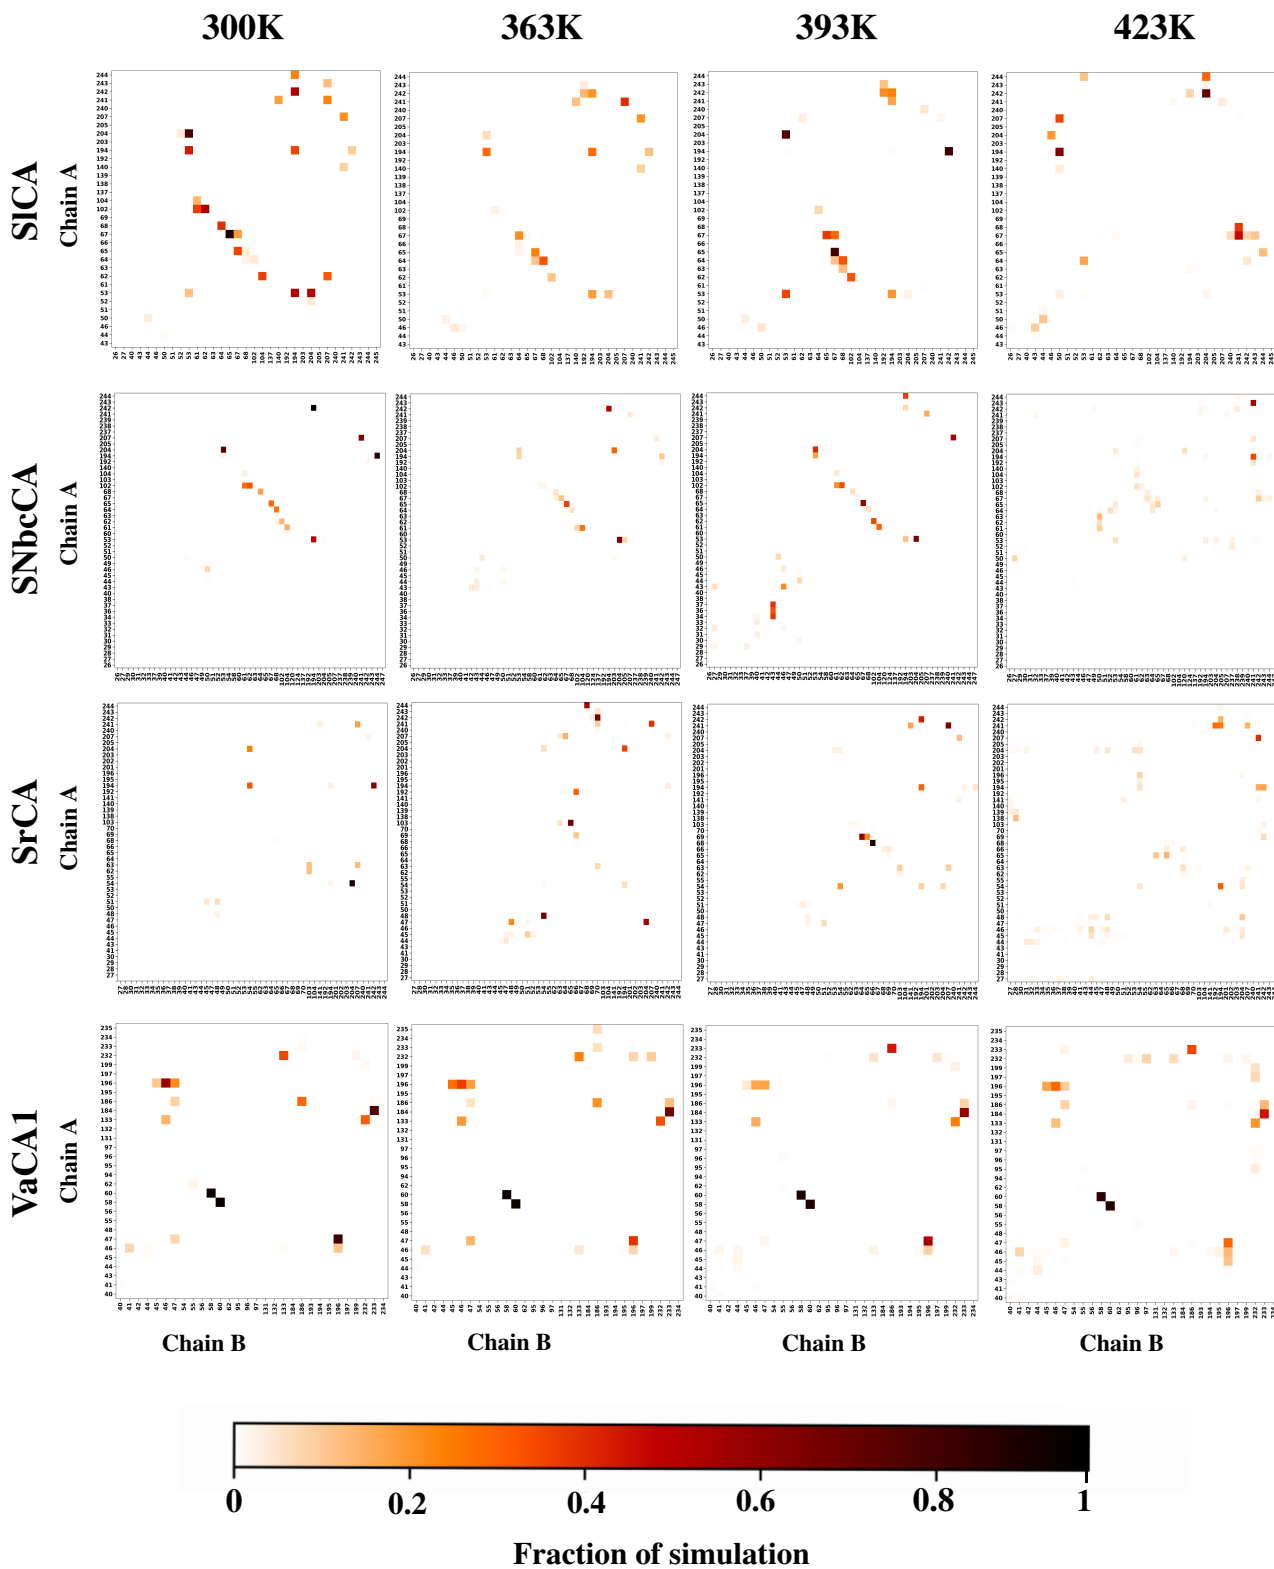

Figure S10: Inter-subunit hydrogen bonds of SICA, SNbcCA, SrCA and VaCA1 at 300 K, 363 K, 393 K and 423 K.

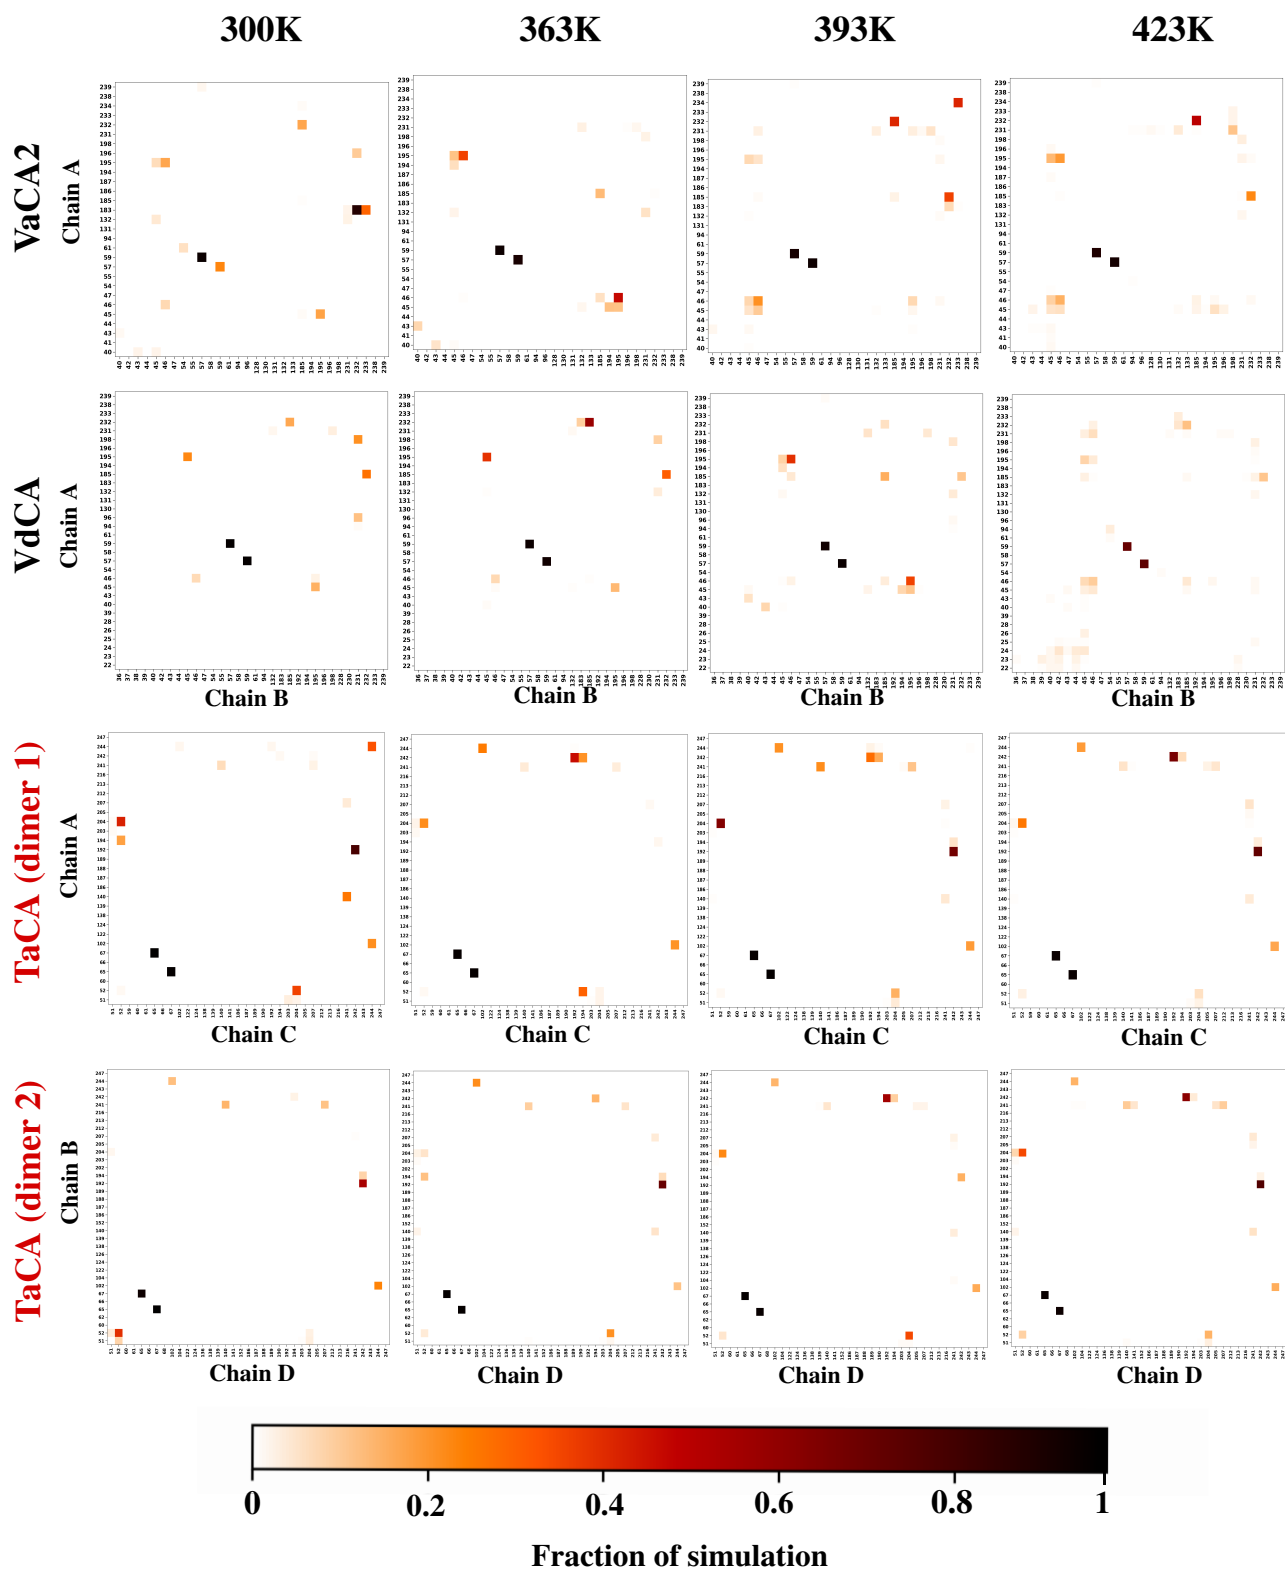

Figure S11: Inter-subunit hydrogen bonds of VaCA2, VdCA, and TaCA at 300 K, 363 K, 393 K and 423 K. TaCA which has been previously characterized, is labelled in red.
